# Supplementary material
Source: PubMed Central journal article supplement (PMC8000201)
Supplement: pnas.2013239118.sapp.pdf [file pnas.2013239118.sapp.pdf]

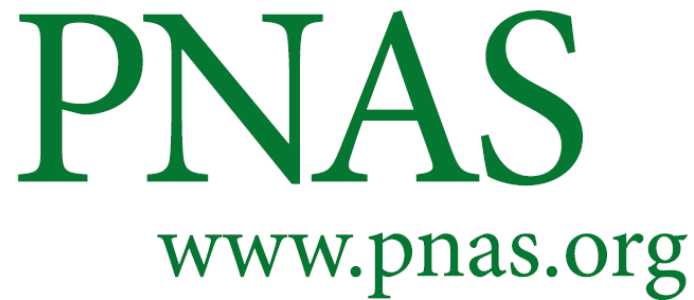

### **Supplementary Information for**

A switch from non-canonical to canonical Wnt signaling stops neuroblast migration through a Slit - Robo and RGA-9b/ARHGAP dependent mechanism

Lorenzo Rella, Euclides E. Fernandes Póvoa, Jonas Mars, Annabel L.P. Ebbing, Luc Schoppink, Marco C. Betist and Hendrik C. Korswagen

Hendrik C. Korswagen  
Email: r.korswagen@hubrecht.eu

#### **This PDF file includes:**

Figures S1 to S3  
Tables S1 to S2  
Legends for Datasets S1 to S2

#### **Other supplementary materials for this manuscript include the following:**

Datasets S1 to S2

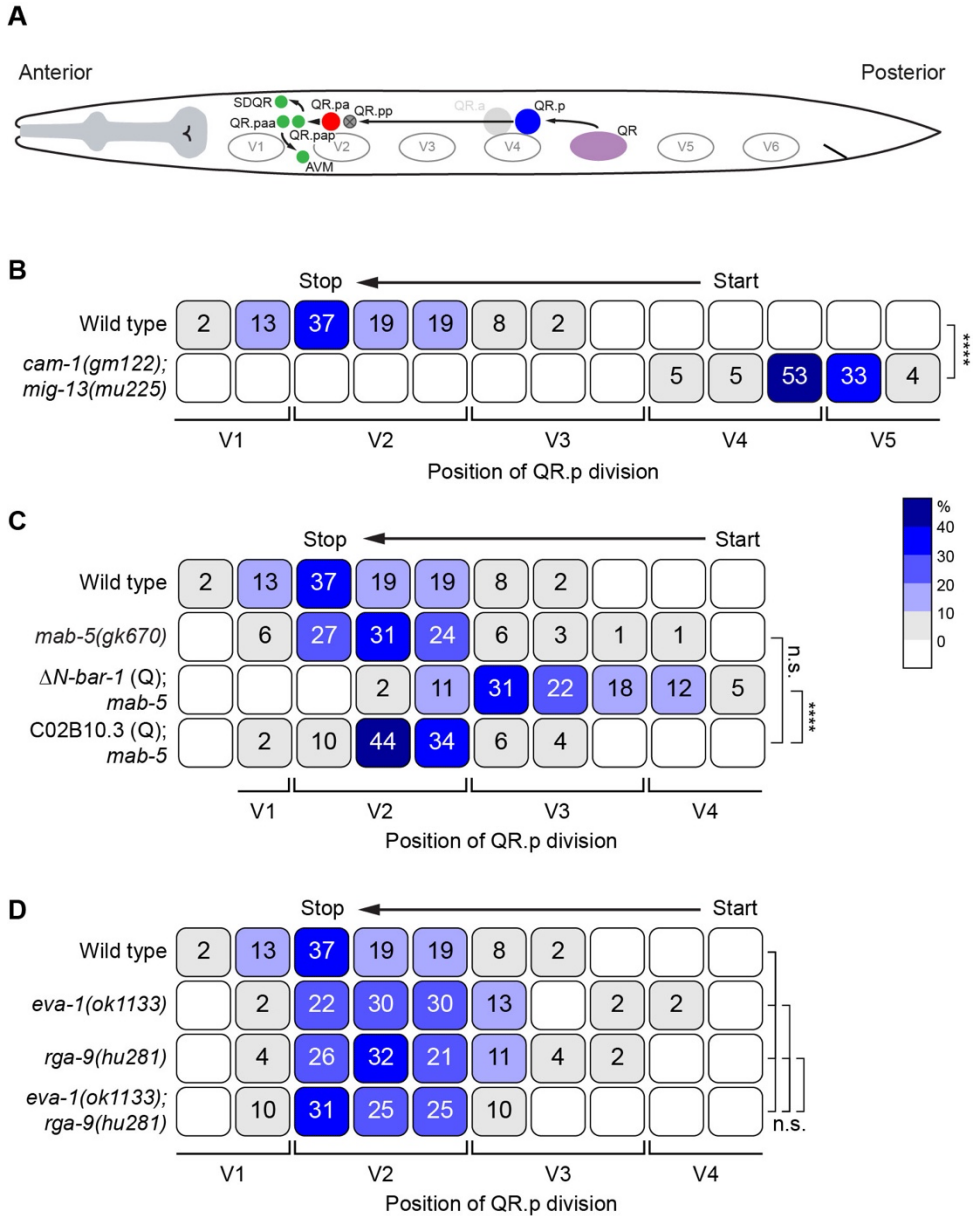

**Fig. S1.** QR neuroblast lineage. (A) QR neuroblast lineage and migration of the QR descendants. (B), (C) and (D) Position of QR.p division with respect to the seam cells, indicated as percentiles of the total number of cells analyzed ( $n \geq 50$  for all genotypes). Statistical significance was calculated using Fisher's exact test (n.s.  $p \geq 0.05$ , \*\*\*\*  $p < 0.0001$ ). The  $\Delta N\text{-BAR-1 (Q)}$  and C02B10.3 (Q) expressing strains contain *mab-5(gk670)*.

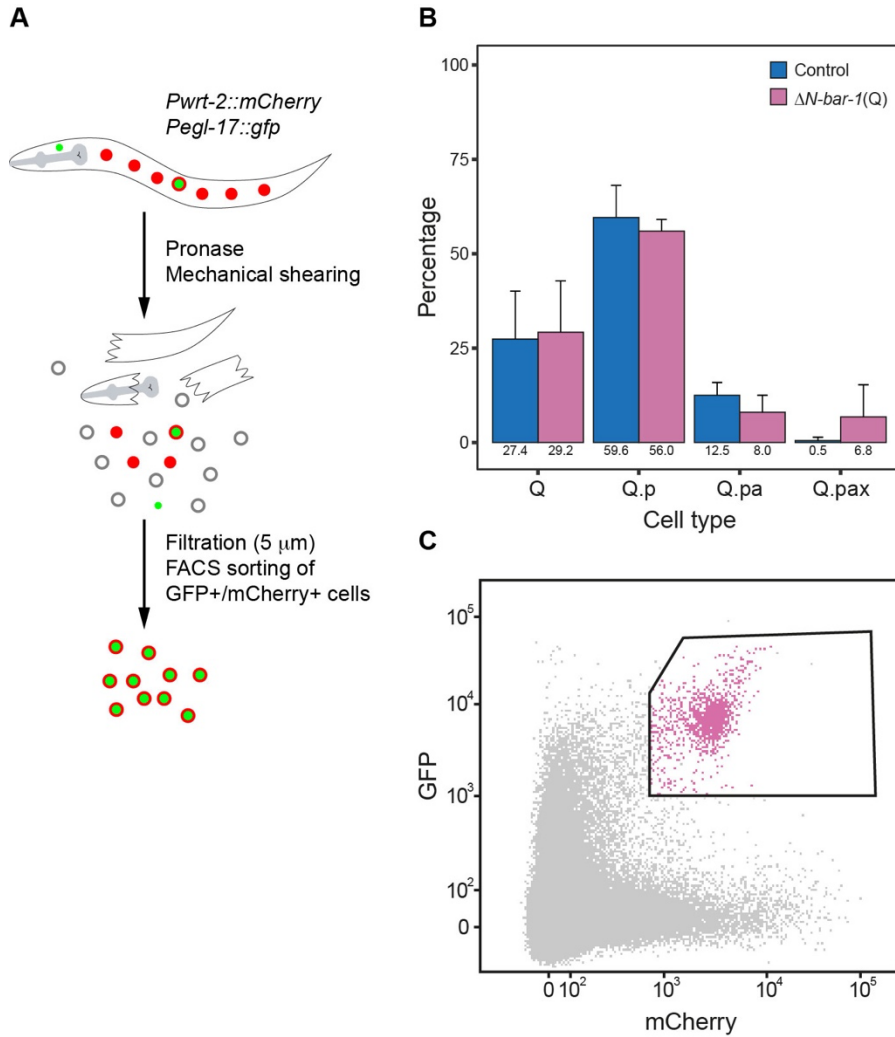

**Fig. S2.** Isolation of the Q neuroblast and their descendants. (A) Schematic representation of the cell isolation procedure. See methods for details. (B) Quantification of Q lineage cells present in synchronized *mab-5(gk670)* control and *mab-5(gk670);  $\Delta N\text{-BAR-1(Q)}$*  animals used for cell isolation. Error bars represent SEM,  $n > 50$ . (C) Representative FACS profile of double labeled Q neuroblast descendants isolated for RNA-sequencing.

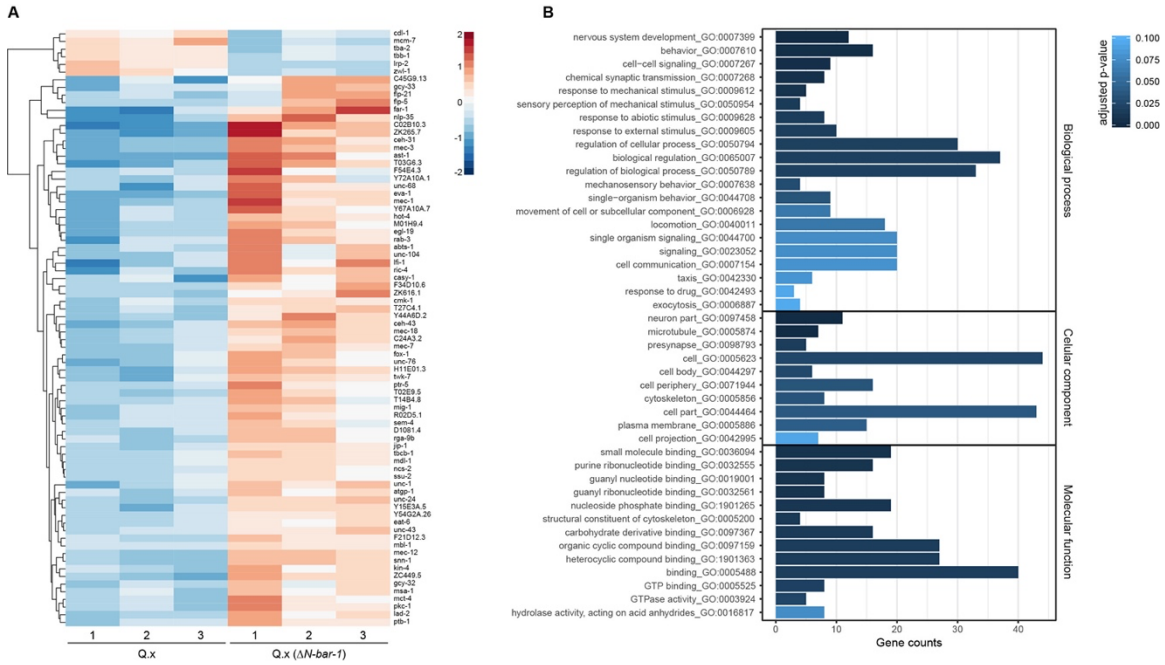

**Fig. S3.** Gene expression changes induced by expression of  $\Delta N$ -BAR-1 in the Q cell lineage. (A) Heat map of genes differentially expressed between *mab-5(gk670)* control and *mab-5(gk670);  $\Delta N$ -BAR-1 (Q)*. (B) Gene ontology enrichment of the same differentially expressed genes.

**Table S1.** Primers and oligonucleotides.

| sgRNA oligos               |                                                                                                                                                                                                               |
|----------------------------|---------------------------------------------------------------------------------------------------------------------------------------------------------------------------------------------------------------|
| dpy-10                     | gtaatacgactcactatagggctaccataggcaccacgaggtttagagctagaaatagc                                                                                                                                                   |
| Peva-1_TCFm #1             | gtaatacgactcactataggtactttcaaaaaaggcgtagtttagagctagaaatagc                                                                                                                                                    |
| Peva-1_TCFm #2             | gtaatacgactcactataggtctgtactacatattcaagtttagagctagaaatagc                                                                                                                                                     |
| Prga9_TCFm                 | gtaatacgactcactataggacattcgtgaattgctggctgttagagctagaaatagc                                                                                                                                                    |
| rga-9 #1                   | gtaatacgactcactataggaaaggagtcggcgctcgagggttagagctagaaatagc                                                                                                                                                    |
| rga-9 #2                   | gtaatacgactcactatagggctgtcgtcaacgaccggttagagctagaaatagc                                                                                                                                                       |
| rga-9 #3                   | gtaatacgactcactataggttagagcagttcaaaaataagtttagagctagaaatagc                                                                                                                                                   |
| rga-9 #4                   | gtaatacgactcactataggtcgtcttttctattctaggttagagctagaaatagc                                                                                                                                                      |
| srgp-1 #1                  | gtaatacgactcactataggcaagttgctctaacgaaatgttagagctagaaatagc                                                                                                                                                     |
| srgp-1 #2                  | gtaatacgactcactataggaagatcgacttgatgcaatgttagagctagaaatagc                                                                                                                                                     |
| ssODN repair templates     |                                                                                                                                                                                                               |
| dpy-10                     | actgaactcaatacggcaagatgagaatgactggaaaccgtaccgcatgcggtgcctatggt<br>agcggagcttcacatggcttcagaccaacagcctat                                                                                                        |
| Peva-1_TCFm                | cggaaattccagaacttcaattcaatgggaaaaattgtacgcatcctatgaatgcccctacgct<br>aagggccaagtaagcgaattctatgaaatatctaaagaaaacggaaaaatttcaaaaag<br>gtacagtttaaggtttcccaattataaaaaaatccctctaaacatttccggcaaacggcattttgc<br>cgga |
| Prga9_TCFm                 | ttgaacgcggtattggagactgtaaaaagtgaaatatccaatagaaaagtttggtgaactttggc<br>aaattttactaacattcgataactaaaggatcccattcgtgaattgctggctaggatgataaagct<br>ttggcaattgttagcttctaatgatttaccactttaccaattgtttttcaactttc           |
| srgp-1                     | ttttactttgtttatattcaaaaacatcaagtcgatcttcaaatcgatcaaaagc                                                                                                                                                       |
| Gateway compatible primers |                                                                                                                                                                                                               |
| $\Delta$ N-bar-1(Q)_F      | ggggacaagttgtacaaaaagcaggcttatggccgactatgagccg                                                                                                                                                                |
| $\Delta$ N-bar-1(Q)_R      | ggggaccactttgtacaagaaagctgggtttaaaatcgactattcctag                                                                                                                                                             |
| C02B10.3(Q)_F              | ggggacaagttgtacaaaaagcaggcttatgaccggagcactatgc                                                                                                                                                                |
| C02B10.3 (Q)_R             | ggggaccactttgtacaagaaagctgggttctaatagttgaactgttg                                                                                                                                                              |
| eva-1(Q)_F                 | ggggacaagttgtacaaaaagcaggctcaatgaatatgcatatagttcccc                                                                                                                                                           |
| eva-1(Q)_R                 | ggggaccactttgtacaagaaagctgggtcttaaaaatcatagtgactataatgtggatt                                                                                                                                                  |
| rga-9b(Q)_F                | ggggacaagttgtacaaaaagcaggcttatgacagtggcgagttac                                                                                                                                                                |
| rga-9b(Q)_R                | ggggaccactttgtacaagaaagctgggttcagaactgagtcgatgt                                                                                                                                                               |
| sax-3(Q)_F                 | ggggacaagttgtacaaaaagcaggctatgttcaatcgaaaaacgctg                                                                                                                                                              |
| sax-3(Q)_R                 | ggggaccactttgtacaagaaagctgggttcaagttgttctgtgtgacg                                                                                                                                                             |

**Table S2.** Reagents and resources.

| REAGENT or RESOURCE                                  | SOURCE               | IDENTIFIER    |
|------------------------------------------------------|----------------------|---------------|
| <b>Antibodies</b>                                    |                      |               |
|                                                      |                      |               |
| <b>Bacterial and Virus Strains</b>                   |                      |               |
| OP50                                                 | CGC                  | N/A           |
| One Shot® Top10 chemically competent <i>E. coli</i>  | Invitrogen™          | C404003       |
|                                                      |                      |               |
| <b>Biological Samples</b>                            |                      |               |
|                                                      |                      |               |
| <b>Chemicals, Peptides, and Recombinant Proteins</b> |                      |               |
| Ultra-pure RNase free water                          | Invitrogen™          | 10977049      |
| RNase OUT                                            | Invitrogen™          | 10777-019     |
| Second strand buffer                                 | Invitrogen™          | 10812-014     |
| DNA polymerase I ( <i>E. coli</i> )                  | Invitrogen™          | 18010-025     |
| <i>E. coli</i> DNA ligase                            | Invitrogen™          | 18052-019     |
| T4 RNA ligase 2, truncated                           | NEB Inc.             | M0242         |
| RnaseH ( <i>E. coli</i> )                            | Invitrogen™          | 18021-071     |
| TRIzol™ Reagent                                      | Ambion®              | 15596018      |
| GlycoBlue™ Coprecipitant                             | Ambion®              | AM9515        |
| Chloroform stabilized with ethanol                   | Boom                 | 76025322.2500 |
| Ethanol 100% absolut                                 | Boom                 | 84028185.2500 |
| 2-propanol, HPLC                                     | Boom                 | 76025379.2500 |
| Acetic acetate pH 8.1                                | Sigma-Aldrich®       | 93337         |
| KOAc                                                 | Sigma-Aldrich®       | 95843         |
| MgOAc                                                | Sigma-Aldrich®       | 63052         |
| Ethylenediaminetetraacetic acid solution pH 8        | Sigma-Aldrich®       | 03690         |
| Ampicillin                                           | Sigma-Aldrich®       | A9518         |
| Kanamycin                                            | Sigma-Aldrich®       | K1377         |
| Luria Agar Base                                      | Difco™               | 241320        |
| Luria Bertani Broth                                  | OXOID                | 101417        |
| NGM Agar                                             | OXOID                | CM1110        |
| Sodium azide                                         | Sigma-Aldrich®       | S2002         |
| Paraffin, liquid, GPR Rectapur®                      | VWR™                 | 24679.291     |
| UltraPure™ Agarose                                   | Invitrogen™          | 16500-500     |
|                                                      |                      |               |
| <b>Critical Commercial Assays</b>                    |                      |               |
| Qubit dsDNA HS Assay Kit                             | Invitrogen™          | Q32854        |
| RNA pico kit                                         | Agilent Technologies | 5067-1513     |
| High sensitivity DNA kit                             | Agilent Technologies | 5067-4626     |
| ERCC RNA spike-ins mix                               | Ambion®              | 4456740       |
| MessageAmpII kit                                     | Ambion®              | AM1751        |
| SuperScript II Reverse Transcriptase                 | Invitrogen™          | 18064-014     |
| Deoxynucleotide (dNTP) Solution Mix                  | NEB Inc.             | N0447S        |
| MEGAscript T7 transcription kit                      | Ambion®              | AM1334        |
| AMPure XP beads                                      | Beckman Coulter      | A63880        |
| High-fidelity PCR Master Mix with HF buffer          | NEB Inc.             | M0531         |

|                                                                                                                                                                                 |                 |           |
|---------------------------------------------------------------------------------------------------------------------------------------------------------------------------------|-----------------|-----------|
| RNA RT primer (RP1)                                                                                                                                                             | Illumina®       | N/A       |
| RNA PCR primers                                                                                                                                                                 | Illumina®       | N/A       |
| RNeasy MinElute kit                                                                                                                                                             | Qiagen®         | 74204     |
| MultiSite Gateway® Three- Fragment Vector Construction Kit                                                                                                                      | Invitrogen™     | 12537-023 |
| QIAprep Spin Miniprep Kit                                                                                                                                                       | Qiagen®         | 27106     |
| Deoxynucleotide Triphosphates mix                                                                                                                                               | Promega         | U1420     |
| Experimental Models: Organisms/Strains                                                                                                                                          |                 |           |
| <i>C. elegans: sax-3(ky123)</i>                                                                                                                                                 | CGC             | CX3198    |
| <i>C. elegans: slit-1(eh15)</i>                                                                                                                                                 | CGC             | CX5000    |
| <i>C. elegans: bar-1(ga80)</i>                                                                                                                                                  | CGC             | EW15      |
| <i>C. elegans: hels63[Pwrt-2::GFP::H2B; Pwrt-2::GFP::PH; Plin-48::tdTomato] V; unc-73(e936)</i>                                                                                 | This study      | KN2195    |
| <i>C. elegans: hels63[Pwrt-2::GFP::H2B; Pwrt-2::GFP::PH; Plin-48::tdTomato] V ; mab-5(gk670)</i>                                                                                | This study      | KN2591    |
| <i>C. elegans: hels63[Pwrt-2::GFP::H2B; Pwrt-2::GFP::PH; Plin-48::tdTomato] V ; pix-1(ok982)</i>                                                                                | This study      | KN2592    |
| <i>C. elegans: casIs328[Pegl-17::myri-mCherry; Pegl-17::mCherry-TEV-his-24, Pegl-17::GFP::moesinABD]</i>                                                                        | Gift from G. Ou |           |
| <i>C. elegans: hels63[Pwrt-2::GFP::H2B; Pwrt-2::GFP::PH; Plin-48::tdTomato] V; huls179[Pegl-17::ΔN-bar-1::unc-54 3' UTR; Pmyo-2::mCherry] IV ; mab-5(gk670)</i>                 | This study      | KN2651    |
| <i>C. elegans: ayls9[Pegl-17::GFP] V ; huls166[Pwrt-2::mCherry::H2B; Pwrt-2::mCherry::PH] X ; mab-5(gk670)</i>                                                                  | This study      | KN2664    |
| <i>C. elegans: hels63[Pwrt-2::GFP::H2B; Pwrt-2::GFP::PH; Plin-48::tdTomato] V ; cam1(gm122) ; mig-13(mu225)</i>                                                                 | This study      | KN2680    |
| <i>C. elegans: ayls9[Pegl-17::GFP] V ; huls166[Pwrt-2::mCherry::H2B; Pwrt-2::mCherry::PH] X ; huls179[Pegl-17::ΔN-bar-1::unc-54 3' UTR; Pmyo-2::mCherry] IV ; mab-5(gk670)</i>  | This study      | KN2683    |
| <i>C. elegans: hels63[Pwrt-2::GFP::H2B; Pwrt-2::GFP::PH; Plin-48::tdTomato] V; huls179[Pegl-17::ΔN-bar-1::unc-54 3' UTR; Pmyo-2::mCherry] IV ; mab-5(gk670); pop-1(hu9)</i>     | This study      | KN2684    |
| <i>C. elegans: hels63[Pwrt-2::GFP::H2B; Pwrt-2::GFP::PH; Plin-48::tdTomato] V; huls179[Pegl-17::ΔN-bar-1::unc-54 3' UTR; Pmyo-2::mCherry] IV ; cam-1(gm122) ; mab-5(gk670)</i>  | This study      | KN2707    |
| <i>C. elegans: hels63[Pwrt-2::GFP::H2B; Pwrt-2::GFP::PH; Plin-48::tdTomato] V; huls179[Pegl-17::ΔN-bar-1::unc-54 3' UTR; Pmyo-2::mCherry] IV ; cwn-1(ok546) ; mab-5(gk670)</i>  | This study      | KN2717    |
| <i>C. elegans: hels63[Pwrt-2::GFP::H2B; Pwrt-2::GFP::PH; Plin-48::tdTomato] V; huls179[Pegl-17::ΔN-bar-1::unc-54 3' UTR; Pmyo-2::mCherry] IV ; mab-5(gk670) ; mig-13(mu225)</i> | This study      | KN2754    |
| <i>C. elegans: hels63[Pwrt-2::GFP::H2B; Pwrt-2::GFP::PH; Plin-48::tdTomato] V; cam-1(gm122); mab-5(gk670)</i>                                                                   | This study      | KN2808    |
| <i>C. elegans: hels63[Pwrt-2::GFP::H2B; Pwrt-2::GFP::PH; Plin-48::tdTomato] V ; huEx731[Pegl-17::eva-1 cds::unc-54 3' UTR; pRF4; Plin-32::tdTomato] ; mab-5(gk670)</i>          | This study      | KN2817    |

|                                                                                                                                                                                                                                                                 |            |        |
|-----------------------------------------------------------------------------------------------------------------------------------------------------------------------------------------------------------------------------------------------------------------|------------|--------|
| <i>C. elegans</i> : hels63[Pwrt-2::GFP::H2B; Pwrt-2::GFP::PH; <i>Plin-48</i> ::tdTomato] V ; huEx737[Pegl-17:: <i>rga-9</i> cds:: <i>unc-54</i> 3' UTR; pRF4; <i>Plin-32</i> ::tdTomato] ; <i>mab-5(gk670)</i>                                                  | This study | KN2825 |
| <i>C. elegans</i> : hels63[Pwrt-2::GFP::H2B; Pwrt-2::GFP::PH; <i>Plin-48</i> ::tdTomato] V ; huEx740[Pegl-17::C02B10.3 cds:: <i>unc-54</i> 3' UTR; pRF4; <i>Plin-32</i> ::tdTomato] ; <i>mab-5(gk670)</i>                                                       | This study | KN2828 |
| <i>C. elegans</i> : hels63[Pwrt-2::GFP::H2B; Pwrt-2::GFP::PH; <i>Plin-48</i> ::tdTomato] V ; huEx743[pRF4; <i>Plin-32</i> ::tdTomato] ; <i>mab-5(gk670)</i>                                                                                                     | This study | KN2831 |
| <i>C. elegans</i> : hels63[Pwrt-2::GFP::H2B; Pwrt-2::GFP::PH; <i>Plin-48</i> ::tdTomato] V ; <i>cwn-1(ok546)</i> ; <i>mab-5(gk670)</i>                                                                                                                          | This study | KN2841 |
| <i>C. elegans</i> : hels63[Pwrt-2::GFP::H2B; Pwrt-2::GFP::PH; <i>Plin-48</i> ::tdTomato] V ; <i>cwn-1(ok546)</i> ; <i>pix-1(ok982)</i>                                                                                                                          | This study | KN2845 |
| <i>C. elegans</i> : hels63[Pwrt-2::GFP::H2B; Pwrt-2::GFP::PH; <i>Plin-48</i> ::tdTomato] V ; huls214[Pegl-17:: <i>eva-1</i> cds:: <i>unc-54</i> 3' UTR; pRF4; <i>Plin-32</i> ::tdTomato] ; <i>mab-5(gk670)</i>                                                  | This study | KN2866 |
| <i>C. elegans</i> : hels63[Pwrt-2::GFP::H2B; Pwrt-2::GFP::PH; <i>Plin-48</i> ::tdTomato] V ; huls179[Pegl-17:: $\Delta$ N- <i>bar-1</i> :: <i>unc-54</i> 3' UTR; <i>Pmyo-2</i> ::mCherry] IV ; <i>mab-5(gk670)</i> ; <i>slt-1(eh15)</i>                         | This study | KN2879 |
| <i>C. elegans</i> : hels63[Pwrt-2::GFP::H2B; Pwrt-2::GFP::PH; <i>Plin-48</i> ::tdTomato] V ; huls179[Pegl-17:: $\Delta$ N- <i>bar-1</i> :: <i>unc-54</i> 3' UTR; <i>Pmyo-2</i> ::mCherry] IV ; <i>eva-1(ok1133)</i> ; <i>mab-5(gk670)</i>                       | This study | KN2880 |
| <i>C. elegans</i> : hels63[Pwrt-2::GFP::H2B; Pwrt-2::GFP::PH; <i>Plin-48</i> ::tdTomato] V ; huls179[Pegl-17:: $\Delta$ N- <i>bar-1</i> :: <i>unc-54</i> 3' UTR; <i>Pmyo-2</i> ::mCherry] IV ; <i>eva-1(hu266[Peva-1TCFm])</i> ; <i>mab-5(gk670)</i>            | This study | KN2891 |
| <i>C. elegans</i> : hels63[Pwrt-2::GFP::H2B; Pwrt-2::GFP::PH; <i>Plin-48</i> ::tdTomato] V huls221[Pegl-17:: <i>rga-9b</i> cds:: <i>unc-54</i> 3' UTR; pRF4; <i>Plin-32</i> ::tdTomato] ; <i>mab-5(gk670)</i>                                                   | This study | KN2900 |
| <i>C. elegans</i> : <i>rga-9(hu281)</i>                                                                                                                                                                                                                         | This study | KN2931 |
| <i>C. elegans</i> : casIs328[Pegl-17::myri-mCherry; Pegl-17::mCherry-TEV- <i>his-24</i> , Pegl-17::GFP::moesinABD] ; huls179[Pegl-17:: $\Delta$ N- <i>bar-1</i> :: <i>unc-54</i> 3' UTR; <i>Pmyo-2</i> ::mCherry] IV ; <i>mab-5(gk670)</i>                      | This study | KN2939 |
| <i>C. elegans</i> : hels63[Pwrt-2::GFP::H2B; Pwrt-2::GFP::PH; <i>Plin-48</i> ::tdTomato] V ; huls179[Pegl-17:: $\Delta$ N- <i>bar-1</i> :: <i>unc-54</i> 3' UTR; <i>Pmyo-2</i> ::mCherry] IV ; <i>eva-1(ok1133)</i> ; <i>mab-5(gk670)</i> ; <i>rga-9(hu281)</i> | This study | KN2962 |
| <i>C. elegans</i> : hels63[Pwrt-2::GFP::H2B; Pwrt-2::GFP::PH; <i>Plin-48</i> ::tdTomato] V ; <i>eva-1(ok1133)</i> ; <i>mab-5(gk670)</i> ; <i>rga-9(hu281)</i>                                                                                                   | This study | KN2963 |
| <i>eva-1(ok1133)</i> ; <i>rga-9(hu281)</i>                                                                                                                                                                                                                      | This study | KN2964 |
| <i>C. elegans</i> : hels63[Pwrt-2::GFP::H2B; Pwrt-2::GFP::PH; <i>Plin-48</i> ::tdTomato] V ; huls179[Pegl-17:: $\Delta$ N- <i>bar-1</i> :: <i>unc-54</i> 3' UTR; <i>Pmyo-2</i> ::mCherry] IV ; <i>mab-5(gk670)</i> ; <i>rga-9(hu281)</i>                        | This study | KN2976 |
| <i>C. elegans</i> : hels63[Pwrt-2::GFP::H2B; Pwrt-2::GFP::PH; <i>Plin-48</i> ::tdTomato] V ; huls179[Pegl-17:: $\Delta$ N- <i>bar-1</i> :: <i>unc-54</i> 3' UTR; <i>Pmyo-2</i> ::mCherry] IV ; <i>mab-5(gk670)</i> ; <i>sax-3(ky123)</i>                        | This study | KN3034 |



|                                                                                                                                                                                            |                             |          |
|--------------------------------------------------------------------------------------------------------------------------------------------------------------------------------------------|-----------------------------|----------|
| <i>C. elegans</i> : hels63[Pwrt-2::GFP::H2B; Pwrt-2::GFP::PH; Plin-48::tdTomato] V; huls179[Pegl-17::ΔN-bar-1::unc-54 3' UTR; Pmyo-2::mCherry] IV ; rga-9(hu293[Prga-9TCFm]); mab-5(gk670) | This study                  | KN3055   |
| <i>C. elegans</i> : hels63[Pwrt-2::GFP::H2B; Pwrt-2::GFP::PH; Plin-48::tdTomato] V; huls179[Pegl-17::ΔN-bar-1::unc-54 3' UTR; Pmyo-2::mCherry] IV ; mab-5(gk670) ; srgp-1(hu294)           | This study                  | KN3066   |
| <i>C. elegans</i> : hels63[Pwrt-2::GFP::H2B; Pwrt-2::GFP::PH; Plin-48::tdTomato] V ; rga-9(hu281)                                                                                          | This study                  | KN3079   |
| <i>C. elegans</i> : hels63[Pwrt-2::GFP::H2B; Pwrt-2::GFP::PH; Plin-48::tdTomato] V ; mab-5(gk670) ; pix-1(ok982)                                                                           | This study                  | KN3080   |
| <i>C. elegans</i> : hels63[Pwrt-2::GFP::H2B; Pwrt-2::GFP::PH; Plin-48::tdTomato] V ; mab-5(gk670) ; mig-13(mu225)                                                                          | This study                  | KN3081   |
| <i>C. elegans</i> : hels63[Pwrt-2::GFP::H2B; Pwrt-2::GFP::PH; Plin-48::tdTomato] V huls221[Pegl-17::rga-9b cds::unc-54 3' UTR; pRF4; Plin-32::tdTomato] ; mab-5(gk670); pix-1(ok982)       | This study                  | KN3082   |
| <i>C. elegans</i> : hels63[Pwrt-2::GFP::H2B; Pwrt-2::GFP::PH; Plin-48::tdTomato] V huls221[Pegl-17::rga-9b cds::unc-54 3' UTR; pRF4; Plin-32::tdTomato] ; pix-1(ok982)                     | This study                  | KN3083   |
| <i>C. elegans</i> : eva-1(ok1133); sax-3(ky123)                                                                                                                                            | This study                  | KN3120   |
| <i>C. elegans</i> : hels63[Pwrt-2::GFP::H2B; Pwrt-2::GFP::PH; Plin-48::tdTomato] V; huls221[Pegl-17::rga-9b cds::unc-54 3' UTR; pRF4; Plin-32::tdTomato] ; mab-5(gk670); unc-73(e936)      | This study                  | KN3123   |
| <i>C. elegans</i> : huEx829 [Pegl-17::sax-3, Ptoe-2::GFP, Plin-48::tdTomato]; sax-3(ky123)                                                                                                 | This study                  | KN3150   |
| <i>C. elegans</i> : huEx830 [Pegl-17::sax-3, Ptoe-2::GFP, Plin-48::tdTomato]; sax-3(ky123)                                                                                                 | This study                  | KN3151   |
| <i>C. elegans</i> : hels63[Pwrt-2::GFP::H2B; Pwrt-2::GFP::PH; Plin-48::tdTomato] V; mab-5(gk670); pop-1(hu9)                                                                               | This study                  | KN3161   |
| <i>C. elegans</i> : Bristol (N2) strain as wild-type (WT)                                                                                                                                  | CGC                         | N2       |
| <i>C. elegans</i> : srgp-1(ok300)                                                                                                                                                          | CGC                         | RB570    |
| <i>C. elegans</i> : hels63[Pwrt-2::GFP::H2B; Plin-48::tdTomato] V                                                                                                                          | Gift from S. van den Heuvel | SV1009   |
| <i>C. elegans</i> : eva-1(ok1133)                                                                                                                                                          | CGC                         | VC868    |
| <b>Oligonucleotides</b>                                                                                                                                                                    |                             |          |
| See Table S1 for primer sequences                                                                                                                                                          |                             |          |
| <b>Recombinant DNA</b>                                                                                                                                                                     |                             |          |
| Pegl-17::ΔN-bar-1::unc-54 3' UTR in pDEST4-R3                                                                                                                                              | This study                  | pKN525   |
| Pegl-17::C02B10.3 cds::unc-54 3' UTR in pDEST4-R3                                                                                                                                          | This study                  | pKN576   |
| Pegl-17::rga-9b cds::unc-54 3' UTR in pDEST4-R3                                                                                                                                            | This study                  | pKN585   |
| Pegl-17::eva-1 cds::unc-54 3' UTR in pDEST4-R3                                                                                                                                             | This study                  | pKN597   |
| Plin-32::tdTomato::unc-54 3' UTR in pDEST4-R3                                                                                                                                              | This study                  | pKN611   |
| Plin-48::tdTomato::unc-54 3'UTR                                                                                                                                                            | This study                  | pKN641   |
| Pegl-17::sax-3 cds::unc-54 3' UTR in pDEST4-R3                                                                                                                                             | This study                  | pKN708   |
| Ptoe-2::GFP::unc-54 3'UTR                                                                                                                                                                  | Gift from B. Conradt        | pBC1565  |
| pBlueScript II empty vector                                                                                                                                                                | Agilent Technologies        | 212205-8 |

|                                                                                                  |                                                      |                                                                                                                                                                                                       |
|--------------------------------------------------------------------------------------------------|------------------------------------------------------|-------------------------------------------------------------------------------------------------------------------------------------------------------------------------------------------------------|
| pRF4 <i>rol-6(su1006)</i>                                                                        | (Mello et al., 1991)                                 | N/A                                                                                                                                                                                                   |
| <b>Software and Algorithms</b>                                                                   |                                                      |                                                                                                                                                                                                       |
| Excel 2016                                                                                       | Microsoft                                            | <a href="https://products.office.com/en-us/excel">https://products.office.com/en-us/excel</a>                                                                                                         |
| ImageJ2                                                                                          | ImageJ developers                                    | <a href="https://imagej.net">https://imagej.net</a>                                                                                                                                                   |
| ZEN2 core imaging software                                                                       | Zeiss                                                | <a href="https://www.zeiss.com/microscopy/int/products/microscope-software/zen-2-core.html">https://www.zeiss.com/microscopy/int/products/microscope-software/zen-2-core.html</a>                     |
| BWA v0.7.10                                                                                      | Li H. and Durbin R. (2010). PMID: 20080505           | <a href="http://bio-bwa.sourceforge.net/">http://bio-bwa.sourceforge.net/</a>                                                                                                                         |
| MapAndGo v2                                                                                      | This study                                           | <a href="http://bit.ly/MapAndGo_v2">http://bit.ly/MapAndGo_v2</a>                                                                                                                                     |
| Samtools v1.4.1                                                                                  | Li H.*, Handsaker B.*, et al. (2009). PMID: 19505943 | <a href="http://samtools.sourceforge.net/">http://samtools.sourceforge.net/</a>                                                                                                                       |
| R (v 3.3.2), using the packages: DEseq2, pheatmap, MarkdownReports, ggplot2, corrr, and DNACopy. |                                                      | <a href="https://cran.r-project.org/">https://cran.r-project.org/</a> ,<br><a href="https://bioconductor.org/">https://bioconductor.org/</a> ,<br><a href="https://github.com">https://github.com</a> |
| <b>Other</b>                                                                                     |                                                      |                                                                                                                                                                                                       |
| Borosilicated thin wall capillary                                                                | Harvard apparatus                                    | 30-0039                                                                                                                                                                                               |
| LoBind tubes 1,5ml                                                                               | Eppendorf Tubes®                                     | Z666548                                                                                                                                                                                               |
| LoBind tubes 0,5ml                                                                               | Eppendorf Tubes®                                     | Z666521                                                                                                                                                                                               |

**Dataset S1** (separate file). Genes differentially expressed between *mab-5(gk670)* control and *mab-5(gk670); ΔN-BAR-1* (Q).

**Dataset S2** (separate file). TCF binding sites (HMG motif) found in the 1.5 kb sequence upstream of genes differentially expressed between *ΔN-BAR-1* and control.
